# Supplementary material for: SARS-CoV-2 suppresses IFNβ production mediated by NSP1, 5, 6, 15, ORF6 and ORF7b but does not suppress the effects of added interferon
Source: PubMed Central journal article supplement (PMC8389490; doi:10.1371/journal.ppat.1009800), 2021-08-26
Supplement: ppat.1009800.s001.pdf [file ppat.1009800.s001.pdf]

**A**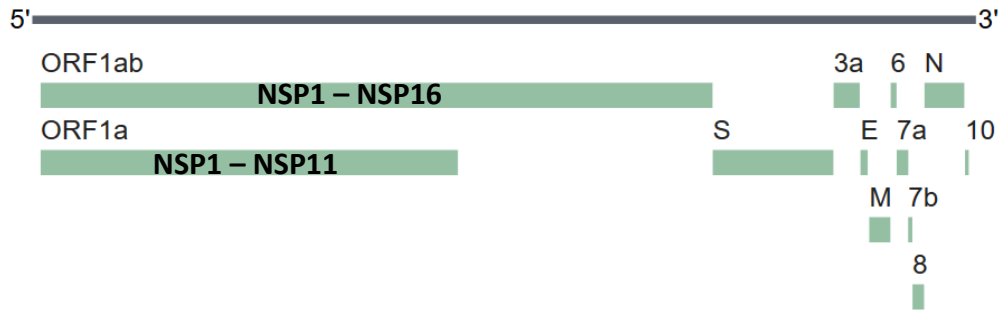**B**

## Gene Expression relative to HPRT1 Control

| Gene        | CALU (7 Hrs) | VERO (5Hrs)  | SEGMENT | HEK-293T |
|-------------|--------------|--------------|---------|----------|
| ORF1a       | 23.2         | 31.5         |         |          |
| ORF1b       | 38.6         | 34.3         |         |          |
| NSP1-NSP11  | 61.8         | 65.8         | NSP6    | 20.6     |
|             |              |              | NSP8    | 36.3     |
| NSP13-NSP15 | 38.6         | 34.3         | NSP13   | 31.1     |
|             |              |              | NSP14   | 14.3     |
|             |              |              | NSP15   | 14.8     |
| S           | 108.8        | 49.3         |         | 1.4      |
| ORF3a       | 178.5        | 86.6         |         | 49.9     |
| ORF3b       |              |              |         | 60.0     |
| E           | 222.5        | 21.4         |         | 35.2     |
| ORF6        |              |              |         | 10.6     |
| ORF7B       |              |              |         | 28.2     |
| ORF8        | 324.0        | 151.4        |         | 30.1     |
| M           | 753.0        | 319.1        |         | 68.8     |
| N           | 1936.4       | 906.3        |         | 92.5     |
| GFP         | Not Relevant | Not Relevant |         | 224.6    |
| HPRT1       | 1.0          | 1.0          |         | 1.00     |
