# Supplementary material for: SARS-CoV-2 suppresses IFNβ production mediated by NSP1, 5, 6, 15, ORF6 and ORF7b but does not suppress the effects of added interferon
Source: PubMed Central journal article supplement (PMC8389490; doi:10.1371/journal.ppat.1009800), 2021-08-26

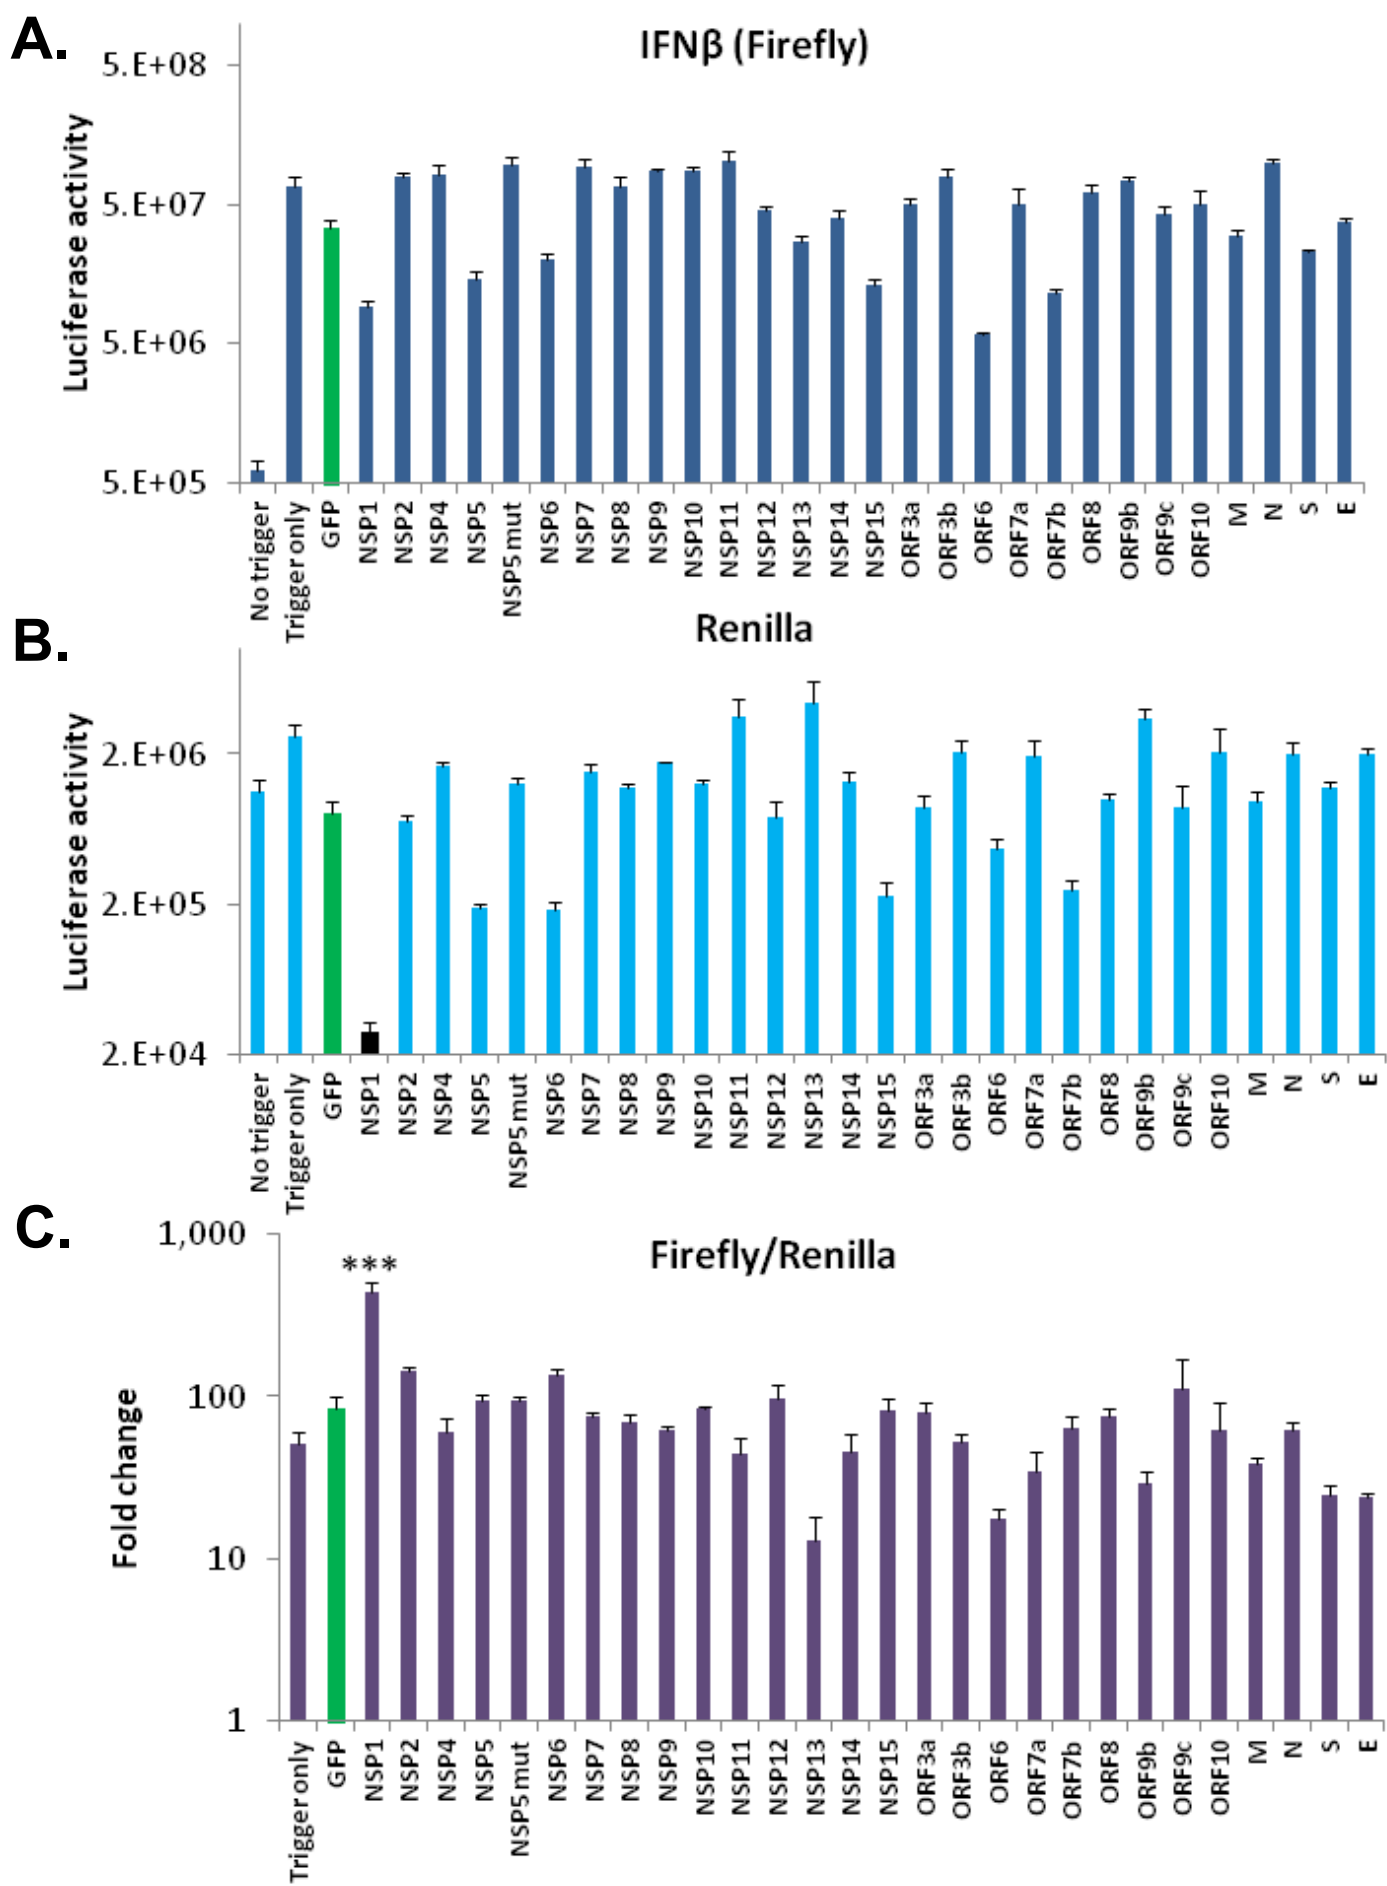

Supplement: ppat.1009800.s003.pdf [file ppat.1009800.s003.pdf]
