# Supplementary material for: SARS-CoV-2 suppresses IFNβ production mediated by NSP1, 5, 6, 15, ORF6 and ORF7b but does not suppress the effects of added interferon
Source: PLoS Pathog. 2021 Aug 26;17(8):e1009800. doi: 10.1371/journal.ppat.1009800 (PMC8389490; doi:10.1371/journal.ppat.1009800)
Supplement: S1 Table — (XLSX) [file ppat.1009800.s008.xlsx]

## Sheet: Sheet1
Assay	Primer ID	Primer Sequence
IFNs	IFNβ - Forward	TGTTGAGAACCTCCTGGCTAA
	IFNβ - Reverse	TCCCCTGGTGAAATCTTCTTT
	IFNλ1 - Forward	TGGAGTTGCAGCTCTCCTGT
	IFN λ1 - Reverse	GCCTCCAGGACCTTCAGC
	IFN λ2/3 - Forward	CAGCTCAGCCTCCAAAGC
	IFN λ2/3 - Reverse	GGCCAAAGATGCCTTAGAAGA
	IFNα2 - Forward	CCATGAGATGATCCAGCAGAT
	IFN α2 - Reverse	CTAGGAGGGTCTCATCCCAAG
	IFN α4 - Forward	ACCTGGTTCAACATGGAAATG
	IFN α4 - Reverse	TTTGATTCAACTCGTGGTGGT
	IFN α6 - Forward	GACTTCAGATTTCCCCAGGAG
	IFN α6 - Reverse	TGTGCTGAAGAGGTTGAAGGT
	IFN α10 - Forward	TATAACCACGACGCGTTGAAT
	IFN α10 - Reverse	GCCTGCACAGGTATACACGAC
	IFN γ - Forward	GCTTTTCAGCTCTGCATCGT
	IFN γ - Reverse	CGCTACATCTGAATGACCTGC
ISGs (HEK cell study)	Mx1 – Forward	AGGAGTTGCCCTTCCCAGA
	Mx1 – Reverse	TCGTTCACAAGTTTCTTCAGTTT
	Mx2 – Forward	GCATCCACCTGAATGCCTAC
	Mx2 – Reverse	ATCATGGCTTTCTGCAAGGA
	OAS2 – Forward	CTGATCGACGAGATGGTGAA
	OAS2 – Reverse	TGTTTTCCGTCCATAGGAGC
	CXCL10 – Forward	TCCACGTGTTGAGATCATTGC
	CXCL10 – Reverse	TCTTGATGGCCTTCGATTCTG
	HPRT1 - Forward	TGACACTGGCAAAACAATGC
	HPRT1 - Reverse	AACACTTCGTGGGGTCCTTT
Transfection efficiency	Puromycin - Forward	TGCAAGAACTCTTCCTCACG
	Puromycin - Reverse	AGGCCTTCCATCTGTTGCT
ISGs after virus infection	IFIT3 – Forward	AGGAAGGGTGGACACAACTG
	IFIT3 – Reverse	TGGCCTGTTTCAAAACATCA
	ISG15 – Forward	CTGGGACCTGAAGGTGAAGA
	ISG15 - Reverse	TCAGAGGTTCATCGCATCTG
	Mx1 – Forward	GAGTGGAGAGGCAAGGTCAG
	Mx1 – Reverse	CCCACAGCCACTCTGGTTAT
	Mx2 – Forward	GGAGGTGCCAAGTAGCAGAG
	Mx2 – Reverse	TTGGGGGAAACATCATTTGT
	OAS2 – Forward	ACCCAGCTCACAGGAGCTTA
	OAS2 – Reverse	CAAAAGCCAAAGGCAGAAAG
	GAPDH – Forward	CGAGATCCCTCCAAAATCAA
	GAPDH – Reverse	TGACGATCTTGAGGCTGTTG
	SARS-CoV2-E – Forward	ACAGGTACGTTAATAGTTAATAGCGT
	SARS-CoV2-E – Reverse	ATATTGCAGCAGTACGCACACA
